# Supplementary material for: A large number of novel coding small open reading frames in the intergenic regions of the Arabidopsis thaliana genome are transcribed and/or under purifying selection
Source: HighWire-hosted journal article supplement (doi:10.1101/gr.5836207), 2007-03-29
Supplement: hanada_etal_supplA.pdf [file hanada_etal_supplA.pdf]

## SUPPLEMENT A-1

### Determination of CI and CI thresholds

**Define sORF in intergenic regions**

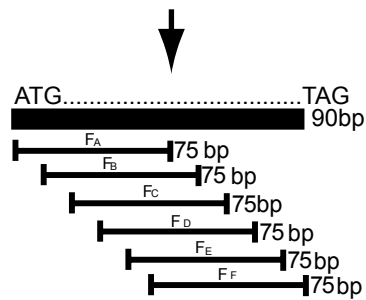

**Calculate Coding Index (CI):**

$$CI = \frac{P(\text{coding}|F_A) + P(\text{coding}|F_B) \dots + P(\text{coding}|F_F)}{7}$$

**Define coding sequences**

If (CI value of an sORF > the threshold),  
the the sORF is a coding sequence

**Generate random sequences for coding and non-coding sequences with different length**

Estimate Coding Index (CI)

**Determine CI threshold based on intron random seq at a particular length**

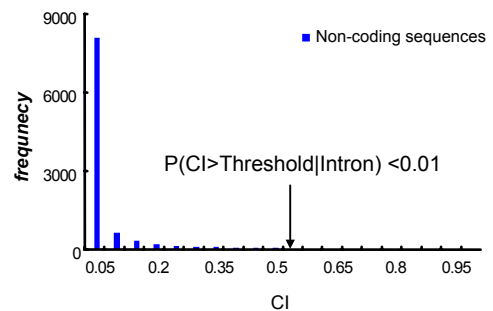

**Define CI thresholds**

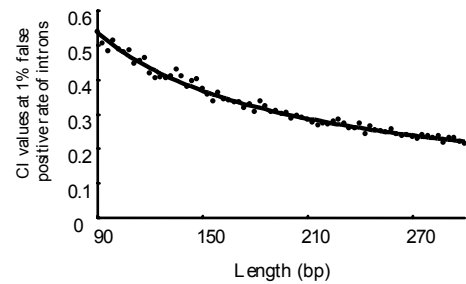

## SUPPLEMENT A-2

Determination of CI thresholds based on simulation studies of CI values of NCDS-like random sequences

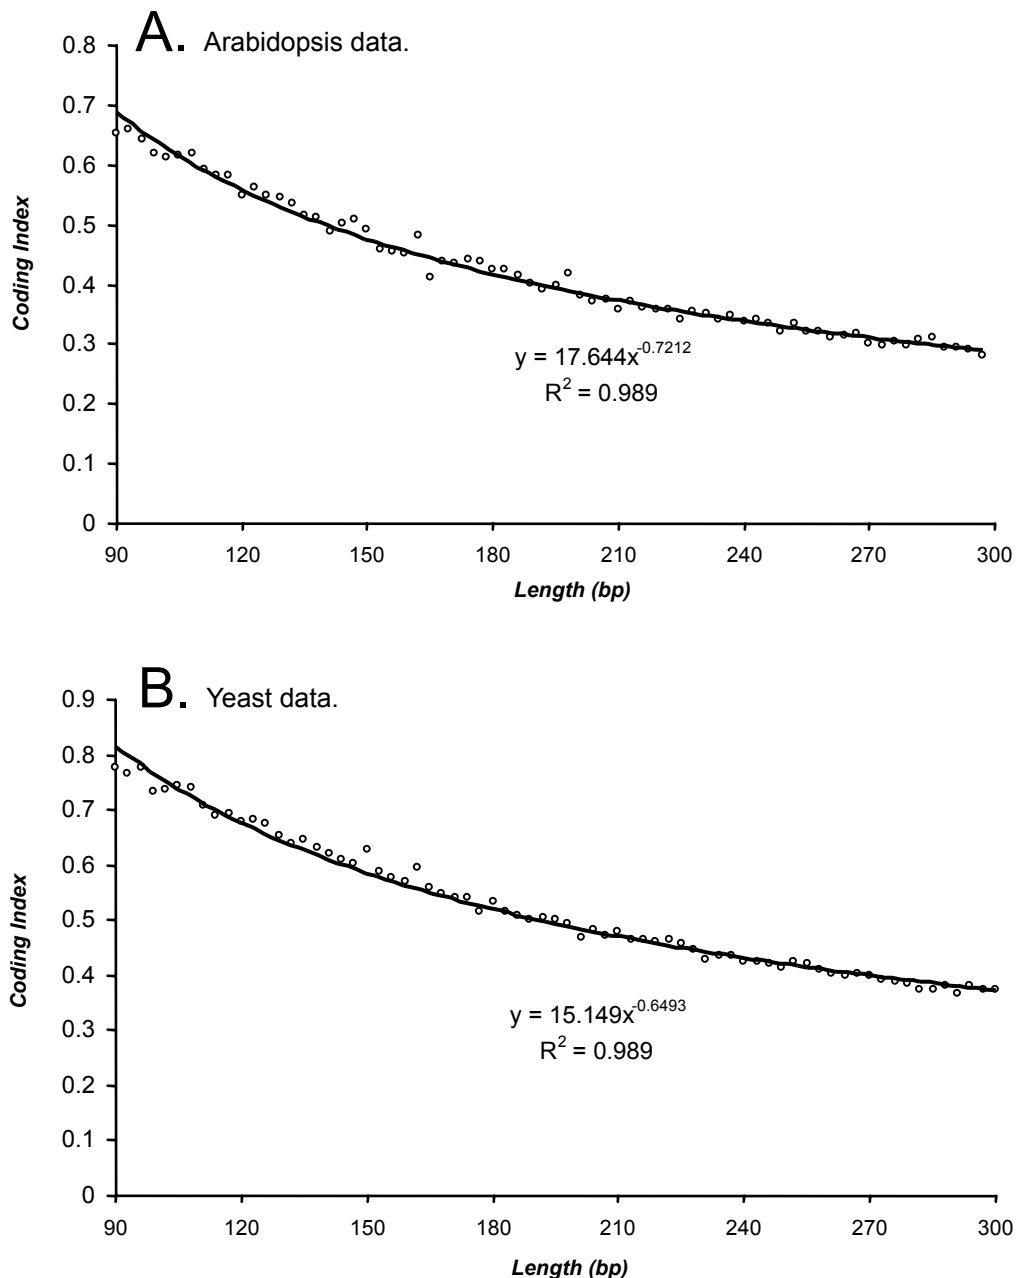

Figure legend: The CI thresholds for (A) *Arabidopsis thaliana* and for (B) yeast. Each circle represents the CI threshold value of a particular size class at 1% false positive rate. The false positive rates were determined based on the distributions of the CI values of 100,000 random NCDS-like sequences for each size class (ranging from 90-300 nucleotides with 3 nt increment). The CI threshold values are fitted with the power. The equation for the fit and correlation coefficients are shown.

## SUPPLEMENT A-3

### Determination of EI and EI thresholds

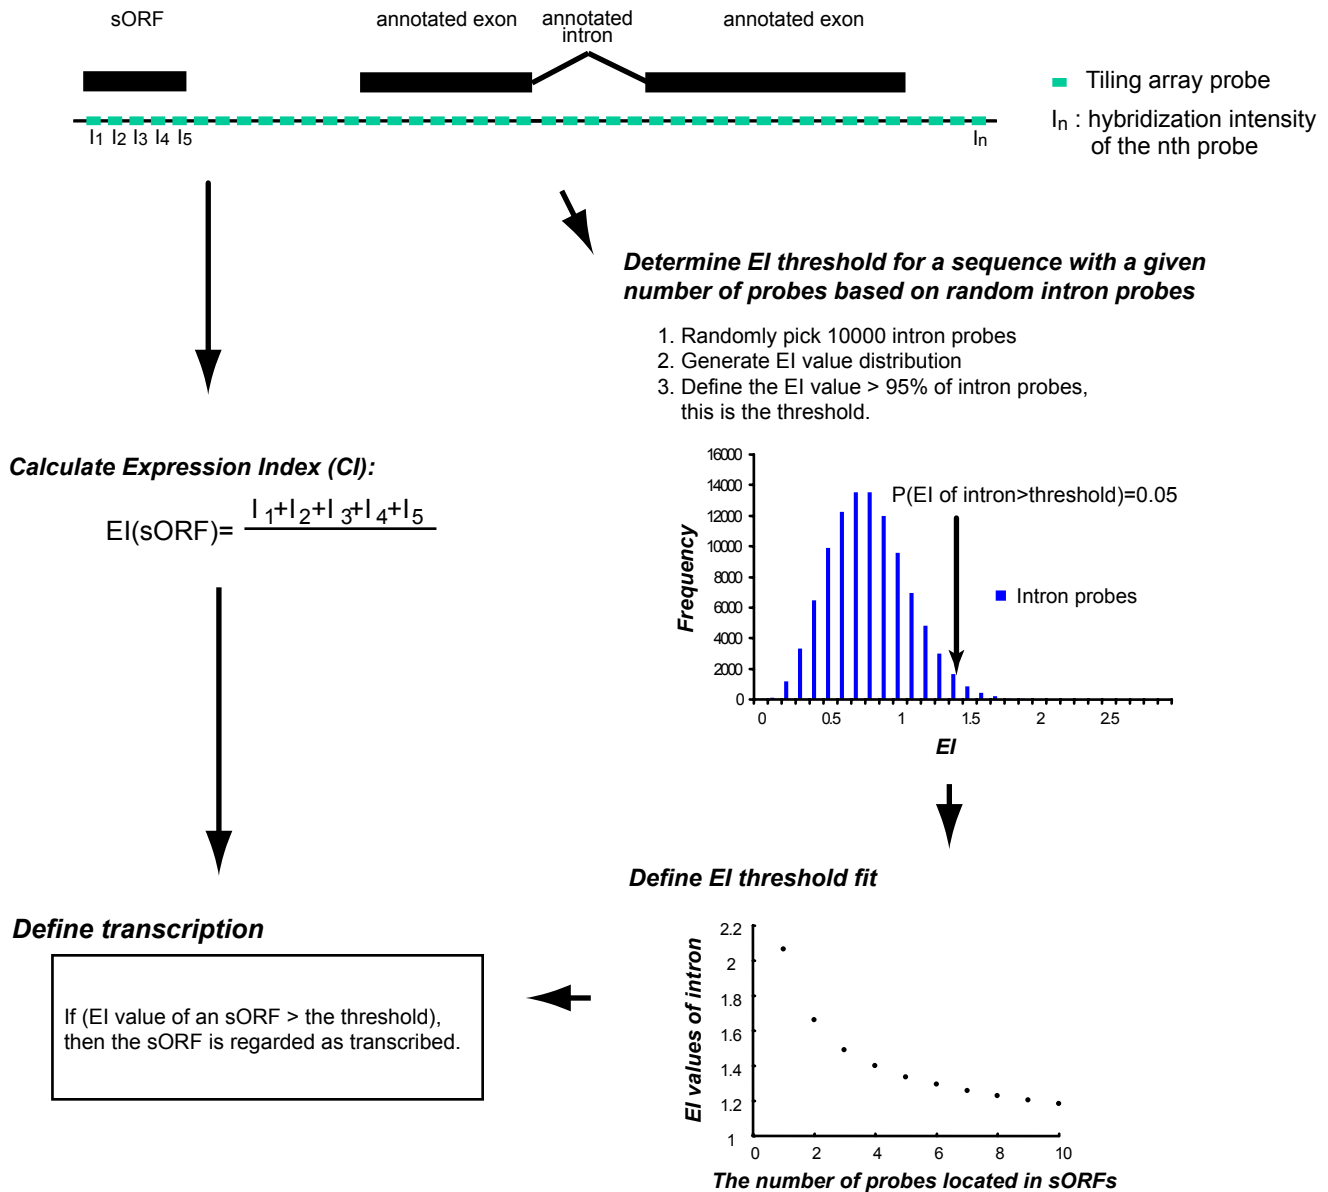

**SUPPLEMENT A-4**

Determination of EI thresholds based on a given number of probes based on random intron probes

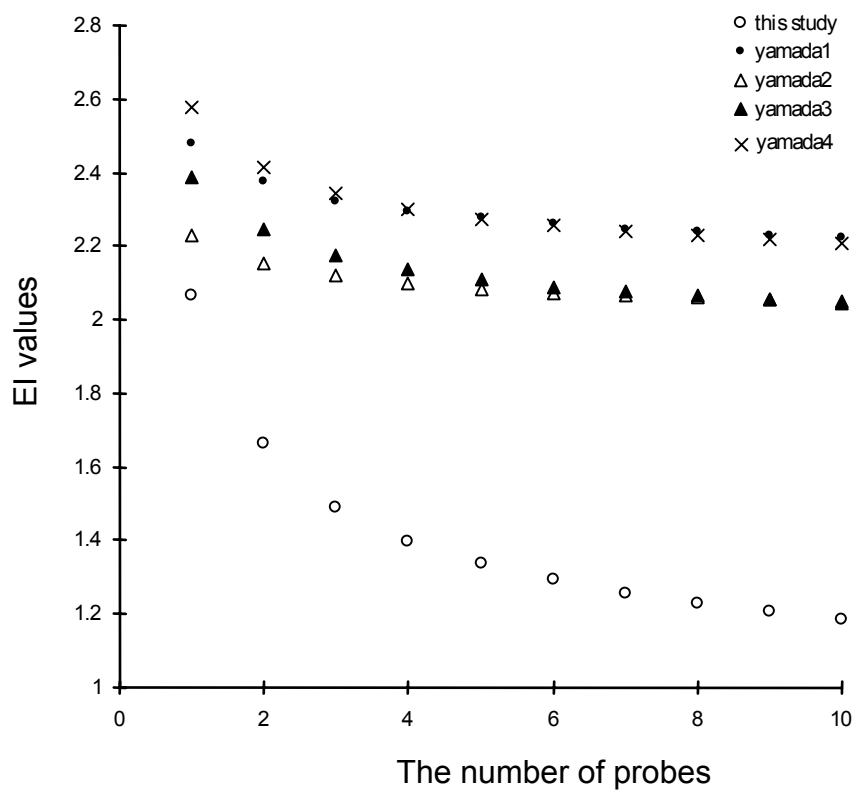

Figure legend: Each point represents the EI threshold value of a given number of probe(s) at 5% false positive rate. The false positive rates were determined based on the EI value distributions of 100,000 randomly sampled intron probes.
